# Supplementary material
Source: PubMed Central journal article supplement (PMC2668336)
Supplement: supp_47_4_1190__1.pdf [file supp_47_4_1190__1.pdf]

**Table SA.** Stability of hybrids formed by binding of Probe A to mycobacterial 16S rRNA gene amplicons

| Sequence of Probe A Compared to Target Sequences *                                                    | Species                  | T <sub>m</sub> |
|-------------------------------------------------------------------------------------------------------|--------------------------|----------------|
| 5' - GCTTTCCACCACA <b>A</b> GACATGCATCC <b>C</b> GTGGTCCTATCCG-3'                                     | <i>M. tuberculosis</i>   | 73             |
| 5' - GCTTTCCACCACA <b>G</b> GACATGCATCC <b>C</b> GTGGTCCTATCCG-3'                                     | <i>M. asiaticum</i>      | 71             |
| 5' - GCTTTCCACCACAC <b>A</b> CCATGC <b>A</b> GCATGTGGTCCTATCCG-3'                                     | <i>M. branderi</i>       | 70             |
| 5' - GCTTTCCACCACA <b>A</b> GACATGCATCC <b>C</b> ATGGTCCTATCCG-3'                                     | <i>M. celatum</i>        | 70             |
| 5' - GCTTTCCACCACA <b>G</b> GACATGA <b>A</b> TCC <b>C</b> GTGGTCCTATCCG-3'                            | <i>M. marinum</i>        | 69             |
| 5' - GCTTTCCACCACAC <b>A</b> CCATGC <b>G</b> ACATGTGGTCCTATCCG-3'                                     | <i>M. shimoidei</i>      | 68             |
| 5' - GCTTTCCACCACA <b>G</b> GCATGC <b>G</b> CGTGGTCCTATCCG-3'                                         | <i>M. chubuense</i>      | 68             |
| 5' - GCTTTCCACCACA <b>G</b> AACATGCATCC <b>C</b> ATGGTCCTATCCG-3'                                     | <i>M. terrae</i>         | 67             |
| 5' - GCTTTCCACCACA <b>A</b> GGCATGC <b>G</b> CC <b>A</b> AGTGGTCCTATCCG-3'                            | <i>M. kansasii</i>       | 67             |
| 5' - GCTTTCCACCACA <b>G</b> AAGACATGC <b>G</b> TCT <b>T</b> GAGGTCCTATCCG-3'                          | <i>M. avium</i>          | 65             |
| 5' - GCTTTCCACCACA <b>A</b> GGCATGC <b>G</b> CT <b>T</b> CGTGGTC <b>A</b> TATCCG-3'                   | <i>M. sherisii</i>       | 65             |
| 5' - GCTTTCCACCACAC <b>G</b> ACATGCATC <b>G</b> CGT <b>A</b> GTCCAT <b>T</b> CG-3'                    | <i>M. aurum</i>          | 64             |
| 5' - GCTTTCCACCACAC <b>A</b> CCATGA <b>A</b> GC <b>G</b> CGTGGTCCTATCCG-3'                            | <i>M. senegalense</i>    | 64             |
| 5' - GCTTTCC <b>C</b> ACA <b>A</b> AGGCATGC <b>G</b> CT <b>T</b> GAGGTCCTATCCG-3'                     | <i>M. haemophilum</i>    | 64             |
| 5' - GCTTTCCACCACAC <b>A</b> CCAT <b>T</b> CGATGC <b>G</b> CGGTCCTATCCG-3'                            | <i>M. triviale</i>       | 63             |
| 5' - GCTTTCCACC <b>T</b> AA <b>A</b> GACATGC <b>G</b> CT <b>A</b> AAAGGTCCTATCCG-3'                   | <i>M. intracellulare</i> | 62             |
| 5' - GCTTTCCACC <b>C</b> CA <b>A</b> GGCATGC <b>G</b> CT <b>C</b> GGGTCCTATCCG-3'                     | <i>M. szulgai</i>        | 62             |
| 5' - GCTTTCCACCACAC <b>A</b> CCATGA <b>A</b> GC <b>G</b> CGGTCCTATCCG-3'                              | <i>M. engbaekii</i>      | 61             |
| 5' - GCTTTCCACCACA <b>G</b> GCATGA <b>A</b> T <b>G</b> CGTGGTCCTAT <b>T</b> CG-3'                     | <i>M. tokaiense</i>      | 61             |
| 5' - GCTTTCCACC <b>A</b> AA <b>A</b> GGCATGC <b>G</b> CC <b>A</b> AAAGGTCCTATCCG-3'                   | <i>M. lentiflavum</i>    | 60             |
| 5' - GCTTTCCACCACAC <b>A</b> CCATGA <b>A</b> GC <b>G</b> CGTGGTC <b>A</b> TAT <b>T</b> CG-3'          | <i>M. fortuitum</i>      | 58             |
| 5' - GCTTTCCACC <b>C</b> CA <b>A</b> GGCATGC <b>G</b> CT <b>C</b> GGGGTCCTAT <b>T</b> CG-3'           | <i>M. malmoense</i>      | 58             |
| 5' - <b>A</b> CTTTCCACCAC <b>C</b> CCACATGC <b>G</b> C <b>A</b> GA <b>A</b> TGGTCCTATCCG-3'           | <i>M. xenopi</i>         | 57             |
| 5' - GCTTT <b>G</b> CACC <b>A</b> CT <b>C</b> ACCATGA <b>A</b> GT <b>G</b> TGTGGTCCTATCCG-3'          | <i>M. abscessus</i>      | 57             |
| 5' - GCTTTCCACCACA <b>A</b> CCATGC <b>A</b> GG <b>C</b> ATGA <b>T</b> CCAT <b>T</b> CG-3'             | <i>M. rhodesiae</i>      | 54             |
| 5' - GCTTTCCACCACAC <b>C</b> CCATGA <b>A</b> G <b>A</b> GC <b>G</b> CGGTC <b>A</b> TAT <b>T</b> CG-3' | <i>M. diernhoferi</i>    | 52             |
| 5' - GCTTTCCACCACA <b>A</b> CCATGA <b>A</b> GG <b>C</b> ATGA <b>T</b> CCAT <b>T</b> CG-3'             | <i>M. aichiense</i>      | 48             |

\* Those nucleotides in each target sequence that are not complementary to the corresponding nucleotide in Probe A are indicated by black letters.

**Table SB.** Stability of hybrids formed by binding of Probe B to mycobacterial 16S rRNA gene amplicons

| Sequence of Probe B Compared to Target Sequences *                                                     | Species                  | T <sub>m</sub> |
|--------------------------------------------------------------------------------------------------------|--------------------------|----------------|
| 5' - GCTTTCCACCACAA <b>G</b> ACATGCATCCCGTGGTCCTATCCG - 3'                                             | <i>M. tuberculosis</i>   | 77             |
| 5' - GCTTTCCACCACA <b>GG</b> ACATGCATCCCGTGGTCCTATCCG - 3'                                             | <i>M. asiaticum</i>      | 76             |
| 5' - GCTTTCCACCACAA <b>G</b> ACATGCATCC <b>A</b> TGGTCCTATCCG - 3'                                     | <i>M. celatum</i>        | 74             |
| 5' - GCTTTCCACCACA <b>G</b> CACATGCAT <b>G</b> CCGTGGTCCTATCCG - 3'                                    | <i>M. chubuense</i>      | 73             |
| 5' - GCTTTCCACCACA <b>GG</b> ACATG <b>AA</b> TCCCGTGGTCCTATCCG - 3'                                    | <i>M. marinum</i>        | 73             |
| 5' - GCTTTCCACCACA <b>G</b> CACATG <b>AA</b> T <b>G</b> CCGTGGTCCTAT <b>T</b> CG - 3'                  | <i>M. tokaiense</i>      | 73             |
| 5' - GCTTTCCACCACA <b>GA</b> ACATGCATCC <b>A</b> TGGTCCTATCCG - 3'                                     | <i>M. terrae</i>         | 72             |
| 5' - GCTTTCCACCACA <b>C</b> ACCATGC <b>A</b> GCATGTGGTCCTATCCG - 3'                                    | <i>M. branderi</i>       | 67             |
| 5' - GCTTTCCACCACA <b>C</b> ACCATGC <b>G</b> ACATGTGGTCCTATCCG - 3'                                    | <i>M. shimoidei</i>      | 66             |
| 5' - GCTTTCCACCACA <b>C</b> ACCATG <b>AA</b> GC <b>G</b> CGTGGTCCTATCCG - 3'                           | <i>M. senegalense</i>    | 66             |
| 5' - GCTTTCCACCACAA <b>GG</b> CATGC <b>G</b> CC <b>AA</b> GTGGTCCTATCCG - 3'                           | <i>M. kansasii</i>       | 65             |
| 5' - GCTTTCCACCACAA <b>GG</b> CATGC <b>G</b> CC <b>T</b> CGTGGTC <b>A</b> TATCCG - 3'                  | <i>M. sherisii</i>       | 63             |
| 5' - GCTTTCCACCACA <b>C</b> ACCATG <b>AA</b> GC <b>G</b> CGCGGTCCATCCG - 3'                            | <i>M. engbaekii</i>      | 63             |
| 5' - GCTTTCCACCACA <b>C</b> ACCAT <b>T</b> CGATG <b>C</b> GCGGTCCATCCG - 3'                            | <i>M. triviale</i>       | 63             |
| 5' - GCTTTCCACCACA <b>C</b> GCATGCAT <b>C</b> GCGT <b>A</b> GTCCAT <b>T</b> CG - 3'                    | <i>M. aurum</i>          | 62             |
| 5' - GCTTTCCACCAG <b>AA</b> GACATGC <b>G</b> T <b>T</b> T <b>G</b> AGGTCCATCCG - 3'                    | <i>M. avium</i>          | 61             |
| 5' - GCTTTCCACCACA <b>C</b> ACCATG <b>AA</b> GC <b>G</b> CGTGGTC <b>A</b> TAT <b>T</b> CG - 3'         | <i>M. fortuitum</i>      | 60             |
| 5' - GCTTTCCACC <b>CC</b> AA <b>GG</b> CATGC <b>G</b> CC <b>T</b> CGGGTCCTATCCG - 3'                   | <i>M. szulgai</i>        | 60             |
| 5' - GCTTTCC <b>CC</b> CA <b>AA</b> GGCATGC <b>G</b> CC <b>T</b> T <b>G</b> AGGTCCATCCG - 3'           | <i>M. haemophilum</i>    | 60             |
| 5' - GCTTTCCACCACA <b>A</b> CCATGC <b>A</b> GG <b>CC</b> ATG <b>A</b> TCCAT <b>T</b> CG - 3'           | <i>M. rhodesiae</i>      | 59             |
| 5' - <b>A</b> CTTTCCACCAC <b>CC</b> CACATGC <b>G</b> C <b>A</b> GAATGGTCCTATCCG - 3'                   | <i>M. xenopi</i>         | 58             |
| 5' - GCTTTCCACC <b>T</b> AA <b>AG</b> ACATGC <b>G</b> CC <b>T</b> AA <b>AG</b> GTCCATCCG - 3'          | <i>M. intracellulare</i> | 58             |
| 5' - GCTTTCCACC <b>AAA</b> GGCATGC <b>G</b> CC <b>AAA</b> AGGTCCATCCG - 3'                             | <i>M. lentiflavum</i>    | 57             |
| 5' - GCTTTCCACC <b>CC</b> AA <b>GG</b> CATGC <b>G</b> CC <b>T</b> CGGGTCCTAT <b>T</b> CG - 3'          | <i>M. malmoense</i>      | 57             |
| 5' - GCTTTCCACCACA <b>A</b> CCATG <b>AA</b> GG <b>CC</b> ATG <b>A</b> TCCAT <b>T</b> CG - 3'           | <i>M. aichiense</i>      | 55             |
| 5' - GCTTT <b>G</b> CACCAC <b>T</b> CACCATG <b>AA</b> GT <b>G</b> TGTGGTCCTATCCG - 3'                  | <i>M. abscessus</i>      | 55             |
| 5' - GCTTTCCACCACA <b>C</b> CCATG <b>AA</b> G <b>AG</b> CGCGGT <b>C</b> A <b>T</b> AT <b>T</b> CG - 3' | <i>M. diernhoferi</i>    | 54             |

\* Those nucleotides in each target sequence that are not complementary to the corresponding nucleotide in Probe B are indicated by black letters.

**Table SC** Stability of hybrids formed by binding of Probe C to mycobacterial 16S rRNA gene amplicons

| Sequence of Probe C Compared to Target Sequences *                            | Species                  | T <sub>m</sub> |
|-------------------------------------------------------------------------------|--------------------------|----------------|
| 5' - GCTTTCCACCAAAAAGGCATGCGCC <b>AAA</b> AGGTCCTATCCG - 3'                   | <i>M. lentiflavum</i>    | 71             |
| 5' - GCTTTCC <b>CCAC</b> AAAAGGCATGCGCCT <b>TG</b> AGGTCCTATCCG - 3'          | <i>M. haemophilum</i>    | 71             |
| 5' - GCTTTCCACCA <b>CA</b> AGGCATGCGCC <b>AAG</b> TGGTCCTATCCG - 3'           | <i>M. kansasii</i>       | 66             |
| 5' - GCTTTCCACC <b>CCA</b> AGGCATGCGCCT <b>CG</b> GGGTCCTATCCG - 3'           | <i>M. szulgai</i>        | 65             |
| 5' - GCTTTCCACCT <b>TAAAG</b> ACATGCGCCT <b>AA</b> AGGTCCTATCCG - 3'          | <i>M. intracellulare</i> | 64             |
| 5' - GCTTTCCACCA <b>GAA</b> AGACATGCG <b>TCT</b> TGAGGTCCTATCCG - 3'          | <i>M. avium</i>          | 64             |
| 5' - GCTTTCCACCA <b>CA</b> AGGCATGCGCCT <b>CG</b> TGGTCATATCCG - 3'           | <i>M. sherrisii</i>      | 63             |
| 5' - GCTTTCCACCA <b>CCA</b> AGGCATGCGCCT <b>CG</b> GGGTCCTAT <b>TCG</b> - 3'  | <i>M. malmoense</i>      | 62             |
| 5' - GCTTTCCACCA <b>CAC</b> ACCATGCG <b>AC</b> AT <b>GT</b> GGGTCCTATCCG - 3' | <i>M. shimoidei</i>      | 55             |
| 5' - GCTTTCCACCA <b>CAAG</b> ACATGCAT <b>CC</b> ATGGTCCTATCCG - 3'            | <i>M. celatum</i>        | 53             |
| 5' - GCTTTCCACCA <b>CAG</b> CACATGCAT <b>GC</b> CGTGGTCCTATCCG - 3'           | <i>M. chubuense</i>      | 53             |
| 5' - GCTTTCCACCA <b>CAAG</b> ACATGCAT <b>CC</b> CGTGGTCCTATCCG - 3'           | <i>M. tuberculosis</i>   | 53             |
| 5' - <b>ACT</b> TTTCCACCA <b>CCC</b> ACATGCG <b>CAG</b> AATGGTCCTATCCG - 3'   | <i>M. xenopi</i>         | 52             |
| 5' - GCTTTCCACCA <b>CAG</b> ACATGCAT <b>CC</b> CGTGGTCCTATCCG - 3'            | <i>M. asiaticum</i>      | 52             |
| 5' - GCTTTCCACCA <b>CAC</b> ACCATGC <b>AG</b> CAT <b>GT</b> GGGTCCTATCCG - 3' | <i>M. branderi</i>       | 51             |
| 5' - GCTTTCCACCA <b>CAC</b> ACCAT <b>TC</b> GATGC <b>CG</b> GGTCCTATCCG - 3'  | <i>M. triviale</i>       | 51             |
| 5' - GCTTTCCACCA <b>CAGA</b> ACATGCAT <b>CC</b> ATGGTCCTATCCG - 3'            | <i>M. terrae</i>         | 48             |
| 5' - GCTTT <b>GC</b> ACCA <b>CTC</b> ACCATGA <b>AGTGTGT</b> GGGTCCTATCCG - 3' | <i>M. abscessus</i>      | —              |
| 5' - GCTTTCCACCA <b>CAA</b> CCCATGA <b>AGGCC</b> ATGATCCTAT <b>TCG</b> - 3'   | <i>M. aichiense</i>      | —              |
| 5' - GCTTTCCACCA <b>CAC</b> GACATGCAT <b>CG</b> CGTAGTCCTAT <b>TCG</b> - 3'   | <i>M. aurum</i>          | —              |
| 5' - GCTTTCCACCA <b>CAC</b> CCCATGA <b>AGAG</b> CGCGGGTCATAT <b>TCG</b> - 3'  | <i>M. diernhoferi</i>    | —              |
| 5' - GCTTTCCACCA <b>CAC</b> ACCATGA <b>AG</b> CGCGGGTCCTATCCG - 3'            | <i>M. engbaekii</i>      | —              |
| 5' - GCTTTCCACCA <b>CAC</b> ACCATGA <b>AG</b> CGCGTGGTCATAT <b>TCG</b> - 3'   | <i>M. fortuitum</i>      | —              |
| 5' - GCTTTCCACCA <b>CAG</b> ACATGAAT <b>CC</b> CGTGGTCCTATCCG - 3'            | <i>M. marinum</i>        | —              |
| 5' - GCTTTCCACCA <b>CAA</b> CCCATGC <b>AGGCC</b> ATGATCCTAT <b>TCG</b> - 3'   | <i>M. rhodesiae</i>      | —              |
| 5' - GCTTTCCACCA <b>CAC</b> ACCATGA <b>AG</b> CGCGTGGTCCTATCCG - 3'           | <i>M. senegalense</i>    | —              |
| 5' - GCTTTCCACCA <b>CAG</b> CACATGAAT <b>GC</b> CGTGGTCCTAT <b>TCG</b> - 3'   | <i>M. tokaiense</i>      | —              |

\* Those nucleotides in each target sequence that are not complementary to the corresponding nucleotide in Probe C are indicated by black letters.

**Table SD.** Stability of hybrids formed by binding of Probe D to mycobacterial 16S rRNA gene amplicons

| Sequence of Probe D Compared to Target Sequences *                                           | Species                  | T <sub>m</sub> |
|----------------------------------------------------------------------------------------------|--------------------------|----------------|
| 5' - GCTTTCCACCACACACCATGAAGCGCGTGGTCCTAT <b>CCG</b> -3'                                     | <i>M. senegalense</i>    | 77             |
| 5' - GCTTTCCACCACACACCATGAAGCGCGTGGTC <b>A</b> TATTCG-3'                                     | <i>M. fortuitum</i>      | 75             |
| 5' - GCTTTCCACCACACACCATGAAGCGCG <b>C</b> GGTCCTAT <b>CCG</b> -3'                            | <i>M. engbaekii</i>      | 73             |
| 5' - GCTTTCCACCACACACCATG <b>CAGC</b> ATGTGGTCCTAT <b>CCG</b> -3'                            | <i>M. branderi</i>       | 66             |
| 5' - GCTTTCCACCACAC <b>CCC</b> ATGAAG <b>AGCG</b> CGGTC <b>A</b> TATTCG-3'                   | <i>M. diernhoferi</i>    | 66             |
| 5' - GCTTTCCACCACAG <b>C</b> ACATGAAT <b>GC</b> CGTGGTCCTATTCG-3'                            | <i>M. tokaiense</i>      | 66             |
| 5' - GCTTTCCACCACACACCAT <b>TCG</b> ATGCGCGGGTCCTAT <b>CCG</b> -3'                           | <i>M. triviale</i>       | 66             |
| 5' - GCTTTCCACCACACACCATG <b>CGA</b> CTGTGGTCCTAT <b>CCG</b> -3'                             | <i>M. shimoidei</i>      | 64             |
| 5' - GCTTT <b>G</b> CACCAC <b>T</b> CACCATGAAG <b>TGT</b> GTGGTCCTAT <b>CCG</b> -3'          | <i>M. abscessus</i>      | 64             |
| 5' - GCTTTCCACCACAC <b>G</b> ACATG <b>CA</b> T <b>CG</b> CGT <b>AG</b> TCCTATTCG-3'          | <i>M. aurum</i>          | 63             |
| 5' - GCTTTCCACCACAG <b>C</b> ACATG <b>CA</b> T <b>GC</b> CGTGGTCCTAT <b>CCG</b> -3'          | <i>M. chubuense</i>      | 61             |
| 5' - GCTTTCCACCACA <b>A</b> CCCATGAAG <b>GC</b> CA <b>TGA</b> TCCTATTCG-3'                   | <i>M. aichiense</i>      | 60             |
| 5' - GCTTTCCACCACAG <b>G</b> ACATGAAT <b>CC</b> CGTGGTCCTAT <b>CCG</b> -3'                   | <i>M. marinum</i>        | 59             |
| 5' - GCTTTCCACCACA <b>A</b> AGACATG <b>CA</b> T <b>CC</b> CGTGGTCCTAT <b>CCG</b> -3'         | <i>M. tuberculosis</i>   | 58             |
| 5' - GCTTTCCACCACA <b>A</b> GGCATG <b>CGC</b> CA <b>AG</b> TGGTCCTAT <b>CCG</b> -3'          | <i>M. kansasii</i>       | 56             |
| 5' - GCTTTCCACCACA <b>A</b> GGACATG <b>CA</b> T <b>CC</b> CGTGGTCCTAT <b>CCG</b> -3'         | <i>M. asiaticum</i>      | 56             |
| 5' - GCTTTCCACCACA <b>A</b> CCCATG <b>CGA</b> GC <b>ATGA</b> TCCTATTCG-3'                    | <i>M. rhodesiae</i>      | 56             |
| 5' - GCTTTCCACCACA <b>G</b> AACATG <b>CA</b> T <b>CC</b> ATGGTCCTAT <b>CCG</b> -3'           | <i>M. terrae</i>         | 52             |
| 5' - GCTTTCCACCACA <b>A</b> AGACATG <b>CA</b> T <b>CC</b> ATGGTCCTAT <b>CCG</b> -3'          | <i>M. celatum</i>        | 51             |
| 5' - GCTTTCC <b>CCACA</b> AAGGCATG <b>CGC</b> CT <b>TG</b> AGGTCCTAT <b>CCG</b> -3'          | <i>M. haemophilum</i>    | 51             |
| 5' - GCTTTCCACCACA <b>A</b> GGCATG <b>CGC</b> CT <b>CG</b> TGGTC <b>A</b> TAT <b>CCG</b> -3' | <i>M. sherisii</i>       | 50             |
| 5' - GCTTTCCACC <b>CCA</b> AAGGCATG <b>CGC</b> CT <b>CG</b> GGTCCTATTCG-3'                   | <i>M. malmoense</i>      | 50             |
| 5' - <b>A</b> CTTTCCACCAC <b>CC</b> CACATG <b>CGC</b> AG <b>AA</b> TGGTCCTAT <b>CCG</b> -3'  | <i>M. xenopi</i>         | 49             |
| 5' - GCTTTCCACCAG <b>AA</b> GACATG <b>CGT</b> CT <b>TG</b> AGGTCCTAT <b>CCG</b> -3'          | <i>M. avium</i>          | —              |
| 5' - GCTTTCCACC <b>TAA</b> AGACATG <b>CGC</b> CT <b>AAA</b> AGGTCCTAT <b>CCG</b> -3'         | <i>M. intracellulare</i> | —              |
| 5' - GCTTTCCACC <b>AAA</b> AAGGCATG <b>CGC</b> CA <b>AAA</b> AGGTCCTAT <b>CCG</b> -3'        | <i>M. lentiflavum</i>    | —              |
| 5' - GCTTTCCACC <b>CCA</b> AAGGCATG <b>CGC</b> CT <b>CG</b> GGTCCTAT <b>CCG</b> -3'          | <i>M. szulgai</i>        | —              |

\* Those nucleotides in each target sequence that are not complementary to the corresponding nucleotide in Probe D are indicated by black letters.
